# Supplementary material for: Can sPD-1 and sPD-L1 Plasma Concentrations Predict Treatment Response among Patients with Extraparenchymal Neurocysticercosis?
Source: MDPI journal article supplement (doi:10.3390/pathogens12091116), 2023-09-01
Supplement: s1 [file s1]

Table S1. Correlations between pre-treatment and 1-month post-treatment levels of sPD-1, sPD-L1, and their ratio with different immunological markers

|                                | Pre-treatment        |                      |                     | 1-month post-treatment |                     |                     |
|--------------------------------|----------------------|----------------------|---------------------|------------------------|---------------------|---------------------|
|                                | sPD-1                | sPD-L1               | sPD-1/sPD-L1        | sPD-1                  | sPD-L1              | sPD-1/sPD-L1        |
| <b>IL-1<math>\beta</math></b>  |                      |                      |                     |                        |                     |                     |
| Pre-Tx                         | NS                   | NS                   | NS                  | NS                     | NS                  | NS                  |
| 1-month post-Tx                | NS                   | r= -0.44<br>p= 0.058 | NS                  | NS                     | NS                  | NS                  |
| 6 months post-Tx               | NS                   | NS                   | NS                  | NS                     | NS                  | NS                  |
| <b>IL-17A</b>                  |                      |                      |                     |                        |                     |                     |
| Pre-Tx                         | NS                   | NS                   | NS                  | NS                     | NS                  | NS                  |
| 1-month post-Tx                | NS                   | NS                   | NS                  | NS                     | NS                  | NS                  |
| 6 months post-Tx               | r= -0.50<br>p= 0.027 | r= -0.67<br>p= 0.001 | NS                  | NS                     | NS                  | NS                  |
| <b>CCL5</b>                    |                      |                      |                     |                        |                     |                     |
| Pre-Tx                         | NS                   | NS                   | r= -0.38<br>p= 0.09 | NS                     | NS                  | NS                  |
| 1-month post-Tx                | NS                   | NS                   | NS                  | NS                     | NS                  | NS                  |
| 6 months post-Tx               | NS                   | NS                   | r= -0.42<br>p= 0.07 | NS                     | NS                  | NS                  |
| <b>IL-6</b>                    |                      |                      |                     |                        |                     |                     |
| Pre-Tx                         | NS                   | NS                   | NS                  | NS                     | NS                  | NS                  |
| 1-month post-Tx                | NS                   | NS                   | NS                  | NS                     | NS                  | r= -0.53<br>p= 0.08 |
| 6 months post-Tx               | r= -0.40<br>p= 0.079 | r= -0.40<br>p= 0.075 | NS                  | r= -0.58<br>p= 0.04    | NS                  | NS                  |
| <b>TNF-<math>\alpha</math></b> |                      |                      |                     |                        |                     |                     |
| Pre-Tx                         | NS                   | NS                   | NS                  | NC                     | NC                  | NC                  |
| 1-month post-Tx                | r= -0.57<br>P= 0.020 | r= -0.60<br>p= 0.014 | NS                  | r= -0.61<br>p= 0.04    | NS                  | NS                  |
| 6 months post-Tx               | NS                   | NS                   | NS                  | r= -0.59<br>p= 0.04    | NS                  | NS                  |
| <b>IL-4</b>                    |                      |                      |                     |                        |                     |                     |
| Pre-Tx                         | NS                   | NS                   | NS                  | NS                     | NS                  | NS                  |
| 1-month post-Tx                | NS                   | NS                   | r= 0.44<br>p= 0.049 | NS                     | NS                  | NS                  |
| 6 months post-Tx               | NS                   | NS                   | NS                  | NS                     | r= -0.54<br>p= 0.07 | NS                  |
| <b>IFN-<math>\gamma</math></b> |                      |                      |                     |                        |                     |                     |
| Pre-Tx                         | NS                   | NS                   | NS                  | NS                     | r= 0.68<br>p= 0.01  | NS                  |
| 1-month post-Tx                | NS                   | NS                   | NS                  | r= 0.67<br>p= 0.01     | r= 0.60<br>p= 0.04  | NS                  |
| 6 months post-Tx               | NS                   | NS                   | r= -0.50<br>p= 0.03 | NS                     | NS                  | NS                  |
| <b>% Proliferative</b>         |                      |                      |                     |                        |                     |                     |
| Pre-Tx                         | NS                   | NS                   | NS                  | NS                     | NS                  | NS                  |
| 1-month post-Tx                | NS                   | NS                   | NS                  | NS                     | NS                  | NS                  |

|                                    |                      |                     |                      |    |                     |                     |
|------------------------------------|----------------------|---------------------|----------------------|----|---------------------|---------------------|
| 6 months post-Tx                   | r= -0.48<br>p= 0.041 | r= -0.40<br>p= 0.09 | r= -0.41<br>p= 0.09  | NS | NS                  | NS                  |
| <b>% Naïve</b><br>Pre-Tx           | NS                   | NS                  | NS                   | NS | NS                  | NS                  |
| 1-month post-Tx                    | NS                   | NS                  | r= -0.56<br>p= 0.02  | NS | NS                  | NS                  |
| 6 months post-Tx                   | NS                   | NS                  | NS                   | NS | NS                  | r= -0.57<br>p= 0.05 |
| <b>% Central memory</b><br>Pre-Tx  | NS                   | NS                  | NS                   | NS | NS                  | NS                  |
| 1-month post-Tx                    | NS                   | NS                  | NS                   | NS | NS                  | NS                  |
| 6 months post-Tx                   | NS                   | NS                  | NS                   | NS | NS                  | NS                  |
| <b>% Effector memory</b><br>Pre-Tx | NS                   | NS                  | NS                   | NS | NS                  | NS                  |
| 1-month post-Tx                    | NS                   | NS                  | NS                   | NS | NS                  | NS                  |
| 6 months post-Tx                   | NS                   | NS                  | r= -0.64<br>p= 0.01  | NS | NS                  | NS                  |
| <b>% NK</b><br>Pre-Tx              | NS                   | NS                  | r= -0.54<br>p= 0.036 | NS | NS                  | NS                  |
| 1-month post-Tx                    | NS                   | NS                  | r= -0.47<br>p= 0.074 | NS | NS                  | NS                  |
| 6 months post-Tx                   | NS                   | NS                  | NS                   | NS | NS                  | NS                  |
| <b>% Tregs</b><br>Pre-Tx           | NS                   | NS                  | NS                   | NS | NS                  | NS                  |
| 1-month post-Tx                    | NS                   | NS                  | NS                   | NS | r= -0.57<br>p= 0.07 | NS                  |
| 6 months post-Tx                   | NS                   | NS                  | NS                   | NS | NS                  | NS                  |

Only results with a  $p < 0.1$  are presented. NS designates a result with a  $p \geq 0.1$ .

IL-5, %Bregs, and %NKT were also assessed, and all correlations were  $p \geq 0.1$ .
